# Supplementary material
Source: PubMed Central journal article supplement (PMC4990486)

# Supplemental Figure 1

## A Non-fasting Glucose Levels

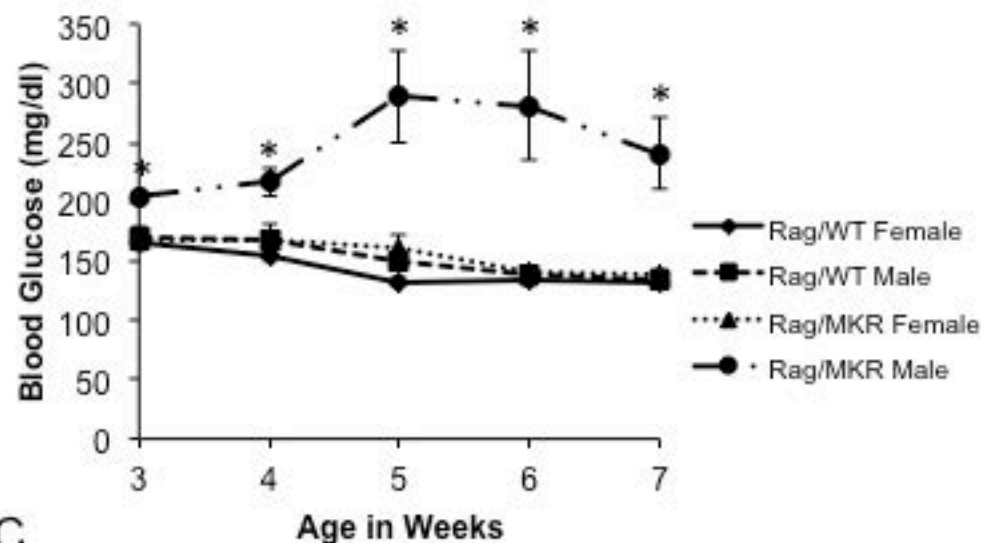

## B Glucose Tolerance Test – 8 wks old

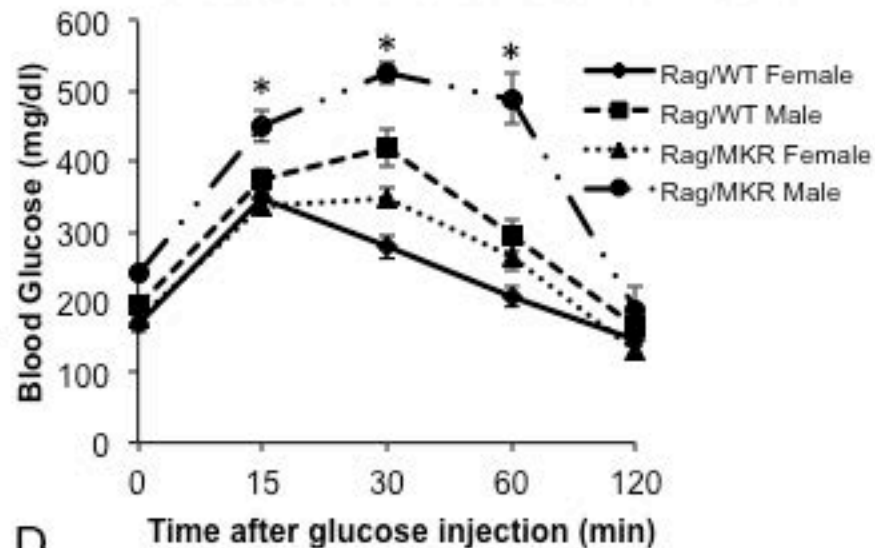

## C Serum Triglyceride Levels

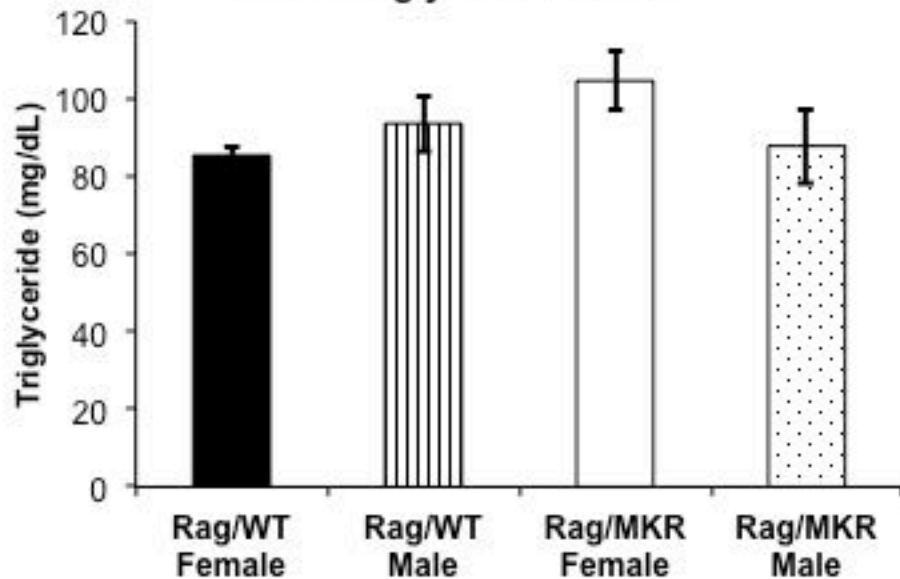

## D Serum Cholesterol Levels

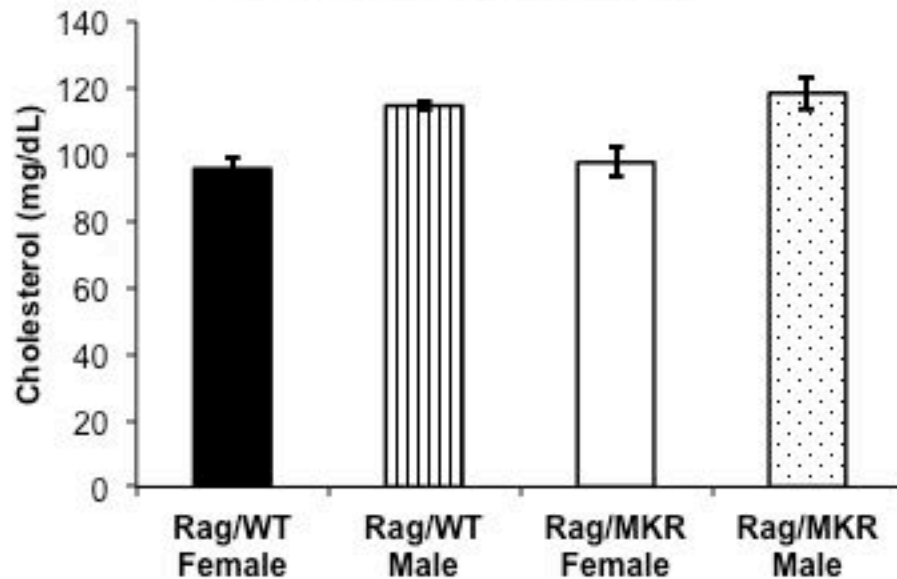

Supplement: NIHMS804738-supplement-01.pdf [file NIHMS804738-supplement-01.pdf]
