# Supplementary material
Source: PubMed Central journal article supplement (PMC4990486)

Supplemental Figure 2

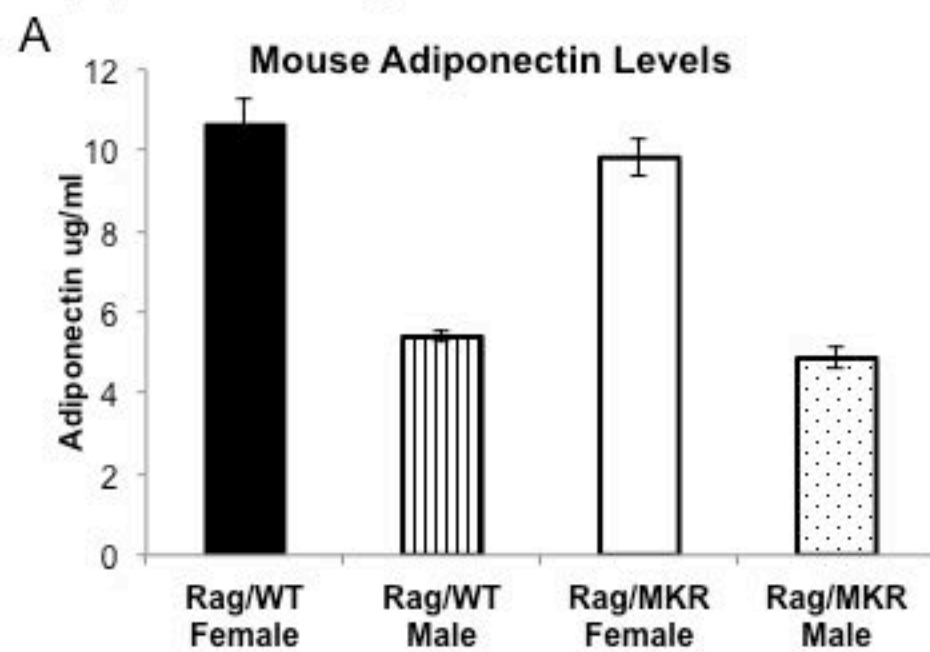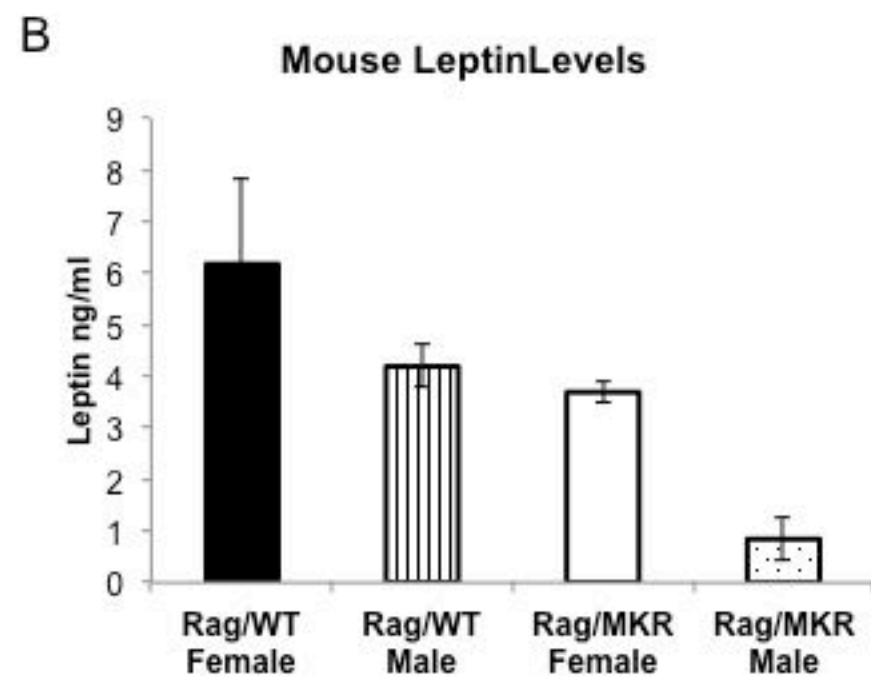

Supplement: NIHMS804738-supplement-02.pdf [file NIHMS804738-supplement-02.pdf]

# Supplemental Figure 3

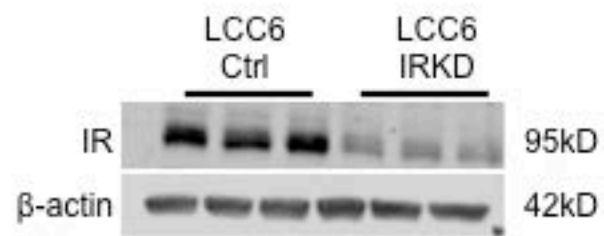

## IR Protein Expression in Cells

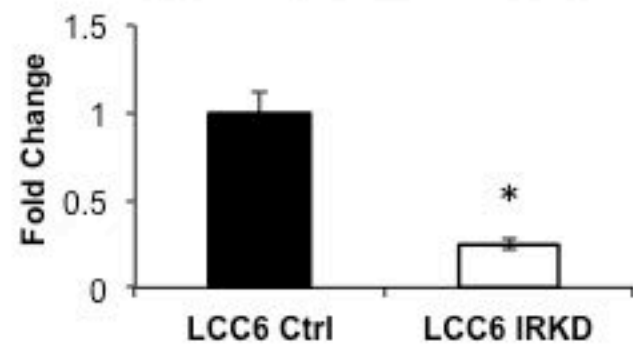

Supplement: NIHMS804738-supplement-03.pdf [file NIHMS804738-supplement-03.pdf]

Supplemental Figure 4

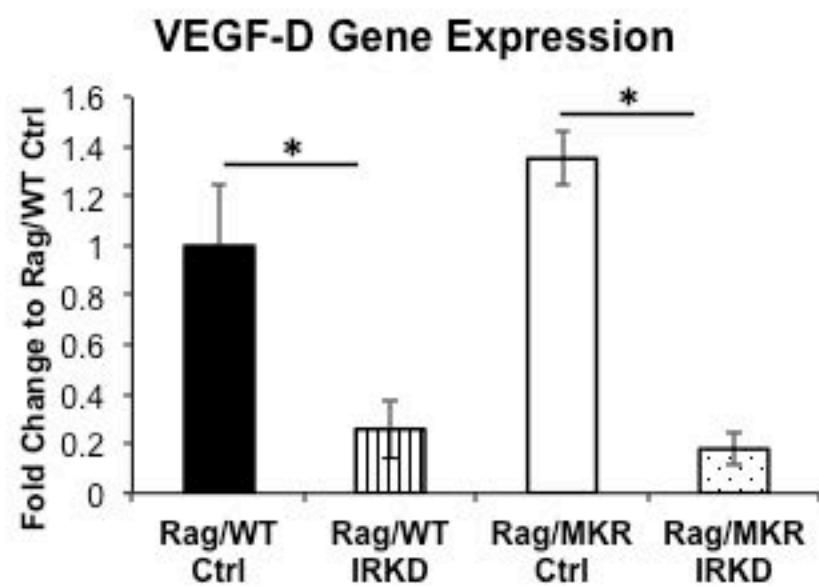

Supplement: NIHMS804738-supplement-04.pdf [file NIHMS804738-supplement-04.pdf]
